# Supplementary material for: Multiplexed end-point microfluidic chemotaxis assay using centrifugal alignment
Source: Royal Society of Chemistry journal article supplement (doi:10.1039/d0lc00311e), 2020-01-01
Supplement: d0lc00311e3.pdf [file d0lc00311e3.pdf]

1  
2  
3  
4  
5  
6  
7  
8  
9  
10  
11  
12  
13  
14  
15  
16  
17

**Electronic Supplementary Information (ESI)**

**Multiplexed End-point Microfluidic Chemotaxis Assay using Centrifugal Alignment**

Sampath Satti,<sup>a,b</sup> Pan Deng,<sup>b,c</sup> Kerryn Matthews,<sup>b,c</sup> Simon P. Duffy,<sup>b,c,d</sup> and Hongshen Ma<sup>\*a,b,c,e</sup>

<sup>a</sup> School of Biomedical Engineering, University of British Columbia

<sup>b</sup> Centre for Blood Research, University of British Columbia

<sup>c</sup> Department of Mechanical Engineering, University of British Columbia

<sup>d</sup> British Columbia Institute of Technology

<sup>e</sup> Department of Urologic Sciences, University of British Columbia

\* Correspondence should be addressed to Hongshen Ma ([hongma@mech.ubc.ca](mailto:hongma@mech.ubc.ca))

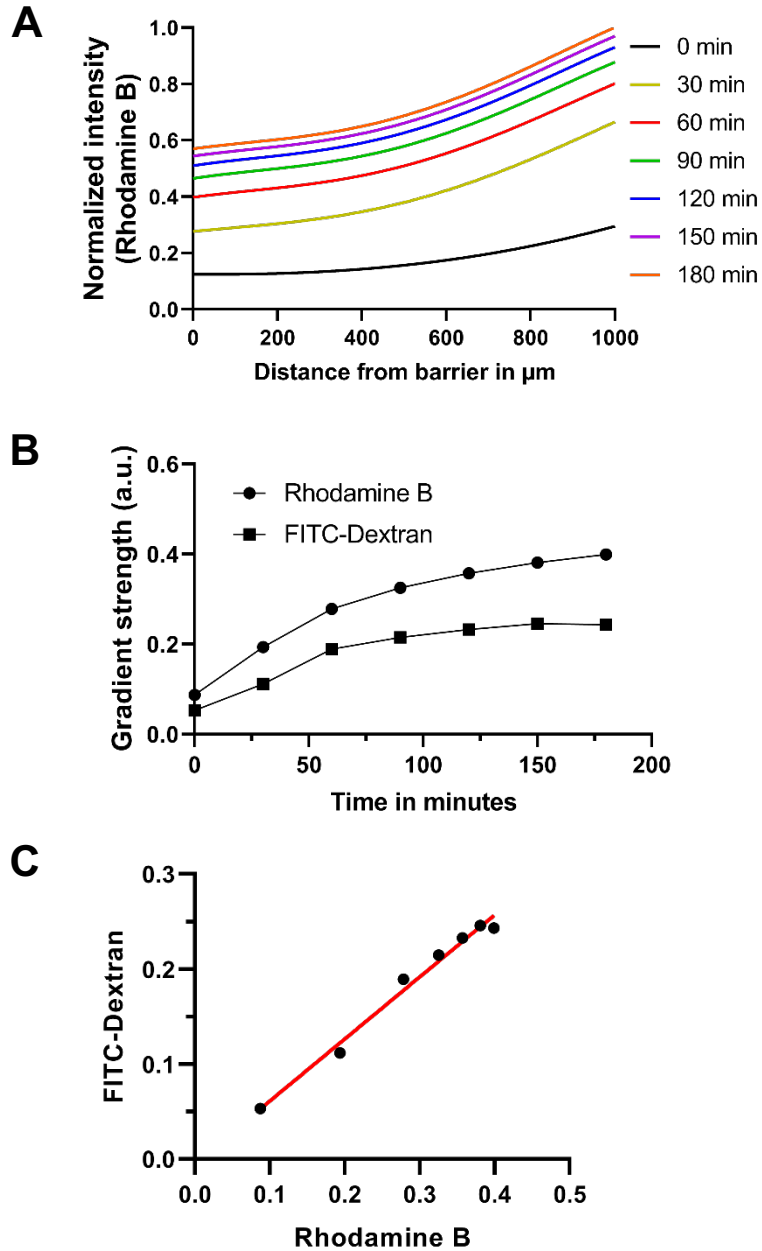

20 **Figure S1.** Experimental study of gradient formation in the design with the barrier feature. (A)  
 21 The gradient profile was visualized using Rhodamine B, which has a similar molecular weight as  
 22 fMLP. (B) The gradient strengths of Rhodamine B and FITC-Dextran measuring a function of  
 23 time. (C) A regression line superimposed on the data from (B), showing a strong correlation  
 24 between the gradient strength of Rhodamine B and fMLP-Dextran ( $R^2 = 0.99$ ).

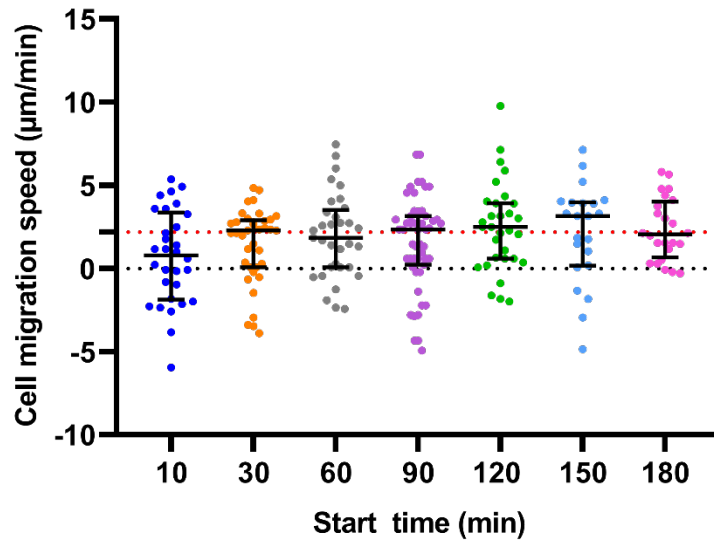

26

27 **Figure S2.** Average migration speed of neutrophils along the direction of microfluidic channels,  
 28 measuring within 10 min after the start time. (N >30, error bars indicate median with  
 29 interquartile range)

30

31

32

33

34

35

36 **Supplementary video 1:** Gradient formation using FITC-Dextran in the design with the barrier  
 37 feature in 180 min.

38

39 **Supplementary video 2:** Human neutrophil migration in the presence of 100 nM fMLP gradient  
 40 within 150 min.

41

42

43
